# Supplementary material
Source: PubMed Central journal article supplement (PMC7116595)
Supplement: EMS98662-supplement-Supplementary_figures_and_tables.pdf [file EMS98662-supplement-Supplementary_figures_and_tables.pdf]

## Supplementary Data for:

### Haptoglobin genotype and outcome after aneurysmal subarachnoid haemorrhage

Matthew J Morton PhD<sup>1#</sup>, Isabel C Hostettler MD<sup>2#</sup>, Nabila Kazmi PhD<sup>3#</sup>, Varinder Alg MBBS<sup>2</sup>, Stephen Bonner PhD<sup>4</sup>, Martin M Brown FRCP<sup>2</sup>, Andrew Durnford MBBS<sup>5</sup>, Ben Gaastra MBBS<sup>5</sup>, Patrick Garland PhD<sup>1</sup>, Joan Grieve MD<sup>6</sup>, Neil Kitchen PhD<sup>6</sup>, Daniel Walsh PhD<sup>7</sup>, Ardalan Zolnourian MBBS<sup>5</sup>, Henry Houlden PhD<sup>8</sup>, Tom R Gaunt PhD<sup>3</sup>, Diederik Bulters FRCS<sup>5</sup>, David J Werring PhD, FRCP<sup>2\$</sup>, Ian Galea PhD, FRCP<sup>1\$\*</sup> on behalf of the Genetics and Observational Subarachnoid Haemorrhage (GOSH) Study investigators

# joint first authorship

\$ joint senior authorship

\* corresponding author

<sup>1</sup> Clinical Neurosciences, Clinical & Experimental Sciences, Faculty of Medicine, University of Southampton, UK

<sup>2</sup> Stroke Research Centre, UCL Queen Square Institute of Neurology, University College London, London, UK

<sup>3</sup> MRC Integrative Epidemiology Unit (IEU), Population Health Sciences, Bristol Medical School, University of Bristol, Bristol, UK

<sup>4</sup> Department of Anaesthesia, The James Cook University Hospital, Middlesbrough, UK

<sup>5</sup> Wessex Neurological Centre, University Hospital Southampton NHS Foundation Trust, Southampton, UK

<sup>6</sup> Department of Neurosurgery, The National Hospital of Neurology and Neurosurgery, London, UK

<sup>7</sup> Department of Neurosurgery, King's College Hospital NHS Foundation Trust, London, UK

<sup>8</sup> Neurogenetics Laboratory, The National Hospital of Neurology and Neurosurgery, London, UK

**Supplementary Figure 1.** mRS and GOS in the analysis population.

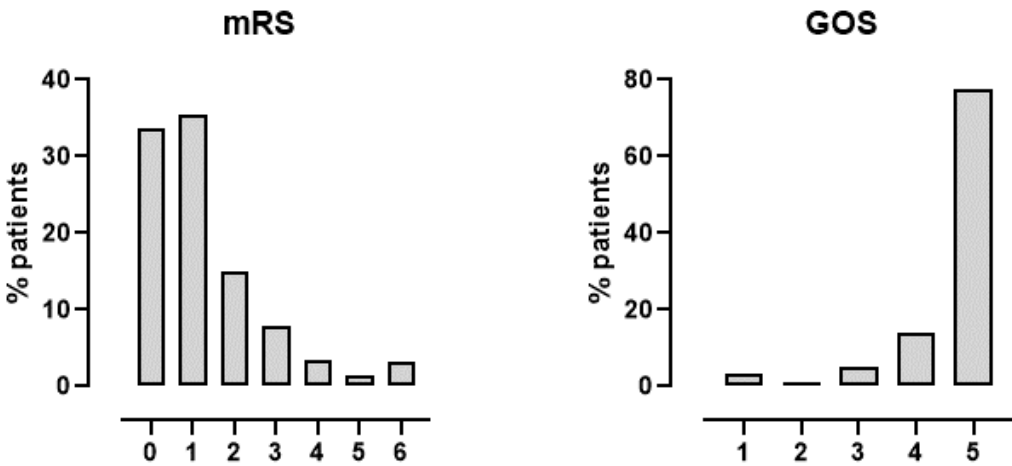

**Supplementary Figure 2.** Mean predicted probability of favourable outcome (mRS: 0-1)  $\pm$  standard deviation, by *HP* CNV and undichotomized Fisher grade. Contrasts: (1) At high Fisher:  $p=0.013$ , Odds ratio = 2.69 (95% CI: 1.2-5.9) for HP2-2 *versus* HP1-1; (2) At low Fisher:  $p=0.42$ , Odds ratio = 2.33 (95% CI: 0.30-17.9) for HP2-2 *versus* HP1-1. Error bars are only shown for Fisher I and IV to enhance readability.

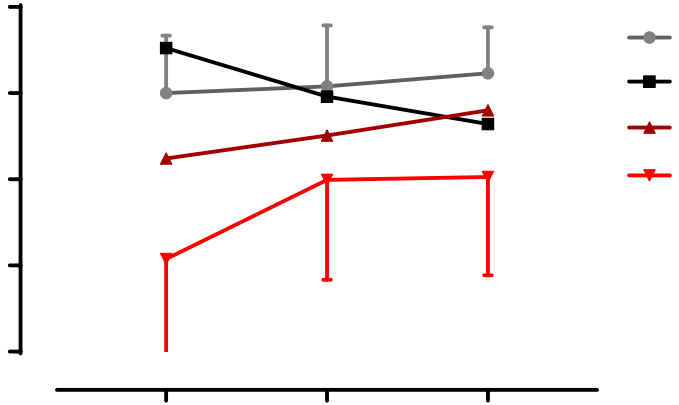

**Supplementary Table 1.** Frequencies of *HP* CNV and rs2000999 genotypes in GOSH and ALSPAC cohorts: n (%).

|               | <b>HP1-1</b> | <b>HP2-1</b> | <b>HP2-2</b> | <b>Total</b> | $\chi^2$ vs GOSH |
|---------------|--------------|--------------|--------------|--------------|------------------|
| <b>GOSH</b>   | 205<br>16%   | 612<br>47%   | 481<br>37%   | 1298<br>100% |                  |
| <b>ALSPAC</b> | 137<br>15%   | 418<br>45%   | 372<br>40%   | 927<br>100%  | NS               |

|               | <b>rs2000999 AA</b> | <b>rs2000999 AG</b> | <b>rs2000999 GG</b> | <b>Total</b> | $\chi^2$ vs GOSH |
|---------------|---------------------|---------------------|---------------------|--------------|------------------|
| <b>GOSH</b>   | 57<br>5%            | 379<br>29%          | 854<br>66%          | 1290<br>100% |                  |
| <b>ALSPAC</b> | 34<br>4%            | 229<br>31%          | 485<br>65%          | 748<br>100%  | NS               |

**Supplementary Table 2.** Multivariable linear regression of plasma haptoglobin level *versus* the *HP* CNV and rs2000999 in the ALSPAC cohort (n=325). *HP* CNV was considered as the exposure and plasma haptoglobin level as the outcome, with adjustment for covariates rs2000999 and sex (model fit:  $r^2 = 0.23$ ,  $p = 2.2 \times 10^{-16}$ ).

|  | <b>Coefficient</b> | <b>SE</b> | <b>Lower 95%<br/>CI</b> | <b>Upper 95%<br/>CI</b> | <b>p value</b> |
|--|--------------------|-----------|-------------------------|-------------------------|----------------|
|--|--------------------|-----------|-------------------------|-------------------------|----------------|

|                             |         |        |        |        |                        |
|-----------------------------|---------|--------|--------|--------|------------------------|
| <b><i>HP</i> CNV</b>        | -0.2641 | 0.0354 | -0.334 | -0.195 | $8.46 \times 10^{-13}$ |
| <b>rs2000999</b>            | -0.1356 | 0.041  | -0.217 | -0.054 | 0.00124                |
| <b>Sex (reference male)</b> | -0.136  | 0.046  | -0.227 | -0.045 | 0.0037                 |

**Supplementary Table 3.** Demographics and clinical characteristics of the CSF cohorts. Mean & SD<sup>a</sup>, number and %<sup>b</sup>.

|                                                                             | <b>High Fisher grade</b>                                      | <b>Low Fisher grade</b>           |
|-----------------------------------------------------------------------------|---------------------------------------------------------------|-----------------------------------|
| <b>Collection</b>                                                           | Prospective                                                   | Retrospective                     |
| <b>Number</b>                                                               | 44                                                            | 8                                 |
| <b>Age (years)<sup>a</sup></b>                                              | 59.8 ± 12.3                                                   | 52.8 ± 9.0                        |
| <b>Sex<sup>b</sup></b><br>male<br>female                                    | 15 (34%)<br>29 (66%)                                          | 2 (25%)<br>6 (75%)                |
| <b>Hypertension<sup>b</sup></b><br>Yes<br>No                                | 23 (52.3%)<br>21 (47.7%)                                      | 1 (12.5%)<br>7 (87.5%)            |
| <b>WFNS<sup>b</sup></b><br>1<br>2<br>3<br>4<br>5                            | 5 (11.4%)<br>10 (18%)<br>6 (13.6%)<br>15 (29.5%)<br>8 (13.6%) | 7 (87.5%)<br>1 (12.5%)            |
| <b>Fisher grade<sup>b</sup></b><br>1<br>2<br>3<br>4                         |                                                               | 7 (87.5%)<br>1 (12.5%)            |
| <b>Aneurysmal management<sup>b</sup></b><br>Coiled<br>Clipped<br>Supportive | 32 (72.7%)<br>5 (11.4%)<br>6 (13.6%)                          | 3 (37.5%)<br>4 (50%)<br>1 (12.5%) |

**Supplementary Table 4.** Analysis after imputation of missing values. Eight variables had missing values (range 0.7-7.4%). The findings were similar to the complete case analysis, namely (1) an interaction between *HP* and Fisher; (2) a protective effect of HP2-2 at high but not low Fisher grade; (3) a poor prognostic effect of a high Fisher category was present in HP1-1 but not HP2-2 patients.

|                                            | Imputation number |          |                  |          |                   |          |                  |          |                  |          | Pooled imputation |          |
|--------------------------------------------|-------------------|----------|------------------|----------|-------------------|----------|------------------|----------|------------------|----------|-------------------|----------|
|                                            | 1                 |          | 2                |          | 3                 |          | 4                |          | 5                |          |                   |          |
|                                            | OR                | <i>p</i> | OR               | <i>p</i> | OR                | <i>p</i> | OR               | <i>p</i> | OR               | <i>p</i> | OR                | <i>p</i> |
| <b>Fisher x <i>HP</i></b>                  |                   | 0.008    |                  | 0.052    |                   | 0.014    |                  | 0.032    |                  | 0.003    |                   |          |
| <b>Fisher at HP1-1</b>                     | 3.9<br>(1.6-9.6)  | 0.003    | 3.4<br>(1.4-8.1) | 0.005    | 4.7<br>(1.8-12.2) | 0.001    | 3.1<br>(1.3-7.3) | 0.008    | 3.7<br>(1.5-9.2) | 0.004    | 3.7<br>(1.4-9.7)  | 0.007    |
| <b>Fisher at HP2-2</b>                     | 0.9<br>(0.5-1.5)  | 0.685    | 1.0<br>(0.6-1.8) | 0.89     | 1.0<br>(0.6-1.7)  | 0.987    | 0.9<br>(0.5-1.6) | 0.781    | 0.8<br>(0.5-1.6) | 0.411    | 0.9<br>(0.5-1.6)  | 0.799    |
| <b><i>HP</i></b>                           |                   | 0.011    |                  | 0.046    |                   | 0.043    |                  | 0.012    |                  | 0.025    |                   |          |
| <b>HP2-2 vs HP1-1 at low Fisher grade</b>  | 0.5<br>(0.2-1.3)  | 0.151    | 0.6<br>(0.3-1.4) | 0.255    | 0.4<br>(0.2-1.1)  | 0.077    | 0.7<br>(0.3-1.6) | 0.373    | 0.4<br>(0.2-1.1) | 0.073    | 0.5<br>(0.2-1.4)  | 0.194    |
| <b>HP2-2 vs HP1-1 at high Fisher grade</b> | 2.3<br>(1.3-4.0)  | 0.003    | 2.0<br>(1.2-3.5) | 0.013    | 2.0<br>(1.2-3.5)  | 0.012    | 2.3<br>(1.3-4.0) | 0.003    | 2.1<br>(1.2-3.6) | 0.009    | 2.1<br>(1.2-3.8)  | 0.01     |
